# Supplementary material
Source: PubMed Central journal article supplement (PMC2140246)
Supplement: NIHMS32234-supplement-01.pdf [file NIHMS32234-supplement-01.pdf]

| $\alpha$ -Turn<br>Polyamide                                                                          | MCF-7 | PC3 | HeLa |
|------------------------------------------------------------------------------------------------------|-------|-----|------|
| <br><b>FITC-1</b>    | --    | --  | -    |
| <br><b>FITC-3</b>    | -     | -   | +    |
| <br><b>FITC-5</b>    | -     | -   | +    |
| <br><b>FITC-8</b>    | --    | --  | +    |
| <br><b>FITC-10</b>   | +     | -   | +    |
| <br><b>FITC-11</b>   | --    | --  | +    |
| <br><b>FITC-12</b> | --    | --  | -    |
| <br><b>FITC-13</b> | --    | --  | -    |

**Supplemental Table 1.**
